# Supplementary material for: Identification of m7G regulator-mediated RNA methylation modification patterns and related immune microenvironment regulation characteristics in heart failure
Source: PubMed Central journal article supplement (PMC9926673; doi:10.1186/s13148-023-01439-3), 2023-02-13
Supplement: 13148_2023_1439_MOESM1_ESM.pdf [file 13148_2023_1439_MOESM1_ESM.pdf]

## Supplementary Information for

### Identification of m<sup>7</sup>G regulator-mediated RNA methylation modification patterns and related immune microenvironment regulation characteristics in heart failure

Table S1. Association of HF occurrence with the differential expression of the five m<sup>7</sup>G regulator markers

Table S2. The characteristics of six screened microarray datasets of HF in GEO database

Table S3. The characteristics of two validation RNA-seq datasets of HF in GEO database

Table S4. Summary of the 29 m<sup>7</sup>G RNA methylation regulator genes

Fig. S1. External validation of the diagnostic value of m<sup>7</sup>G regulator signature for HF

Fig. S2. Unsupervised consensus clustering analysis for HF samples based on m<sup>7</sup>G regulators expression profiles

Fig. S3. The expression profiles of the 14 m<sup>7</sup>G regulators in HF subtype A, subtype B, and NFDs were compared using one way ANOVA.

Fig. S4. The distribution of infiltrating immune cells or activity of immune-related functions in each HF subtype was compared with that of NFDs.

Fig. S5. Clustering analysis for HF samples based on the m<sup>7</sup>G subtype-related differentially expressed genes

Fig. S6. Principal component analysis of batch-corrected expression data of HF microarray datasets

#### References

**Abbreviations:** RNA-seq, RNA-sequencing; HF, heart failure; NFD, nonfailing donor; GEO, Gene Expression Omnibus; OR, odds ratio.

**Table S1 Association of HF occurrence with the differential expression of the five m<sup>7</sup>G regulator markers**

| ID     | OR      | OR 0.95L | OR 0.95H | p-value  |
|--------|---------|----------|----------|----------|
| NUDT16 | -3.2375 | -4.0845  | -2.3905  | 0.000132 |
| NUDT4  | -2.9628 | -3.4544  | -2.4712  | 1.67E-09 |
| CYFIP1 | -4.9084 | -5.8093  | -4.0075  | 5.08E-08 |
| LARP1  | -3.5071 | -4.6744  | -2.3398  | 0.00266  |
| DCP2   | 4.4154  | 3.3387   | 5.4921   | 4.12E-05 |

**Table S2. The characteristics of six screened microarray datasets of HF in GEO database**

| Dataset ID   | Country | Number of samples |     | Microarray platform                         |
|--------------|---------|-------------------|-----|---------------------------------------------|
|              |         | HF                | NFD |                                             |
| GSE16499(1)  | USA     | 15                | 15  | Affymetrix Human Exon 1.0 ST Array          |
| GSE26887(2)  | Italy   | 7                 | 5   | Affymetrix Human Gene 1.0 ST Array          |
| GSE42955(3)  | Spain   | 24                | 5   | Affymetrix Human Gene 1.0 ST Array          |
| GSE57338(4)  | USA     | 54                | 95  | Affymetrix Human Gene 1.1 ST Array          |
| GSE76701(5)  | USA     | 4                 | 4   | Affymetrix Human Genome U133 Plus 2.0 Array |
| GSE79962 (6) | USA     | 20                | 11  | Affymetrix Human Gene 1.0 ST Array          |

**Table S3. The characteristics of two validation microarray datasets of HF in GEO database**

| Dataset ID   | Country | Number of samples |     | Platform ID |
|--------------|---------|-------------------|-----|-------------|
|              |         | HF                | NFD |             |
| GSE46224(7)  | USA     | 15                | 8   | GPL11154    |
| GSE116250(8) | USA     | 50                | 14  | GPL16791    |

**Table S4 Summary of 29 m<sup>7</sup>G RNA methylation regulator genes**

| <b>Gene</b> | <b>Type</b>                                 |
|-------------|---------------------------------------------|
| METTL1      | m <sup>7</sup> G RNA methylation regulators |
| WDR4        | m <sup>7</sup> G RNA methylation regulators |
| NSUN2       | m <sup>7</sup> G RNA methylation regulators |
| DCP2        | m <sup>7</sup> G RNA methylation regulators |
| DCPS        | m <sup>7</sup> G RNA methylation regulators |
| NUDT10      | m <sup>7</sup> G RNA methylation regulators |
| NUDT11      | m <sup>7</sup> G RNA methylation regulators |
| NUDT16      | m <sup>7</sup> G RNA methylation regulators |
| NUDT3       | m <sup>7</sup> G RNA methylation regulators |
| NUDT4       | m <sup>7</sup> G RNA methylation regulators |
| NUDT4B      | m <sup>7</sup> G RNA methylation regulators |
| AGO2        | m <sup>7</sup> G RNA methylation regulators |
| CYFIP1      | m <sup>7</sup> G RNA methylation regulators |
| EIF4E       | m <sup>7</sup> G RNA methylation regulators |
| EIF4E1B     | m <sup>7</sup> G RNA methylation regulators |
| EIF4E2      | m <sup>7</sup> G RNA methylation regulators |
| EIF4E3      | m <sup>7</sup> G RNA methylation regulators |
| GEMIN5      | m <sup>7</sup> G RNA methylation regulators |
| LARP1       | m <sup>7</sup> G RNA methylation regulators |
| NCBP1       | m <sup>7</sup> G RNA methylation regulators |
| NCBP2       | m <sup>7</sup> G RNA methylation regulators |
| NCBP3       | m <sup>7</sup> G RNA methylation regulators |
| EIF3D       | m <sup>7</sup> G RNA methylation regulators |
| EIF4A1      | m <sup>7</sup> G RNA methylation regulators |
| EIF4G3      | m <sup>7</sup> G RNA methylation regulators |
| IFIT5       | m <sup>7</sup> G RNA methylation regulators |
| LSM1        | m <sup>7</sup> G RNA methylation regulators |
| NCBP2L      | m <sup>7</sup> G RNA methylation regulators |
| SNUPN       | m <sup>7</sup> G RNA methylation regulators |

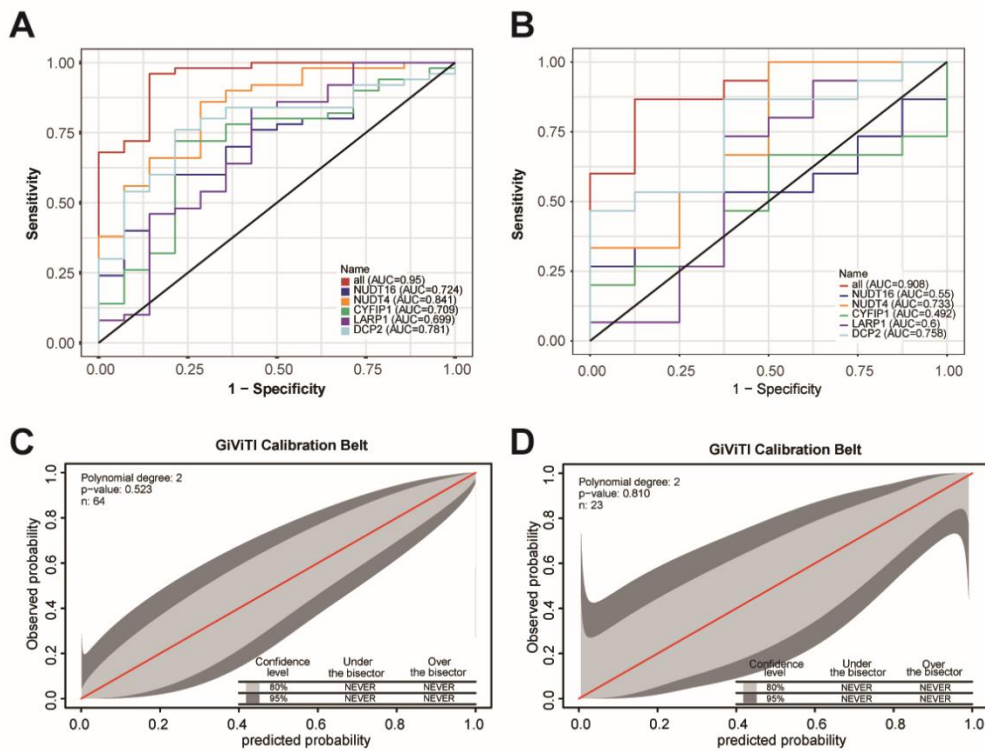

Fig. S1 External validation of the diagnostic value of m<sup>7</sup>G regulator diagnostic signature for HF. A-B, Five m<sup>7</sup>G regulators, including NUDT16, NUDT4, CYFIP1, ARP1, and DCP2, were analyzed for their ability to discriminate between NFD and HF samples by ROC curves in two validation RNA-seq datasets, including GSE46224 (A) and GSE116250 (B). C-D, Calibration curve of the five-gene m<sup>7</sup>G regulator diagnostic signature in two validation RNA-seq datasets, including GSE46224 (C) and GSE116250 (D).

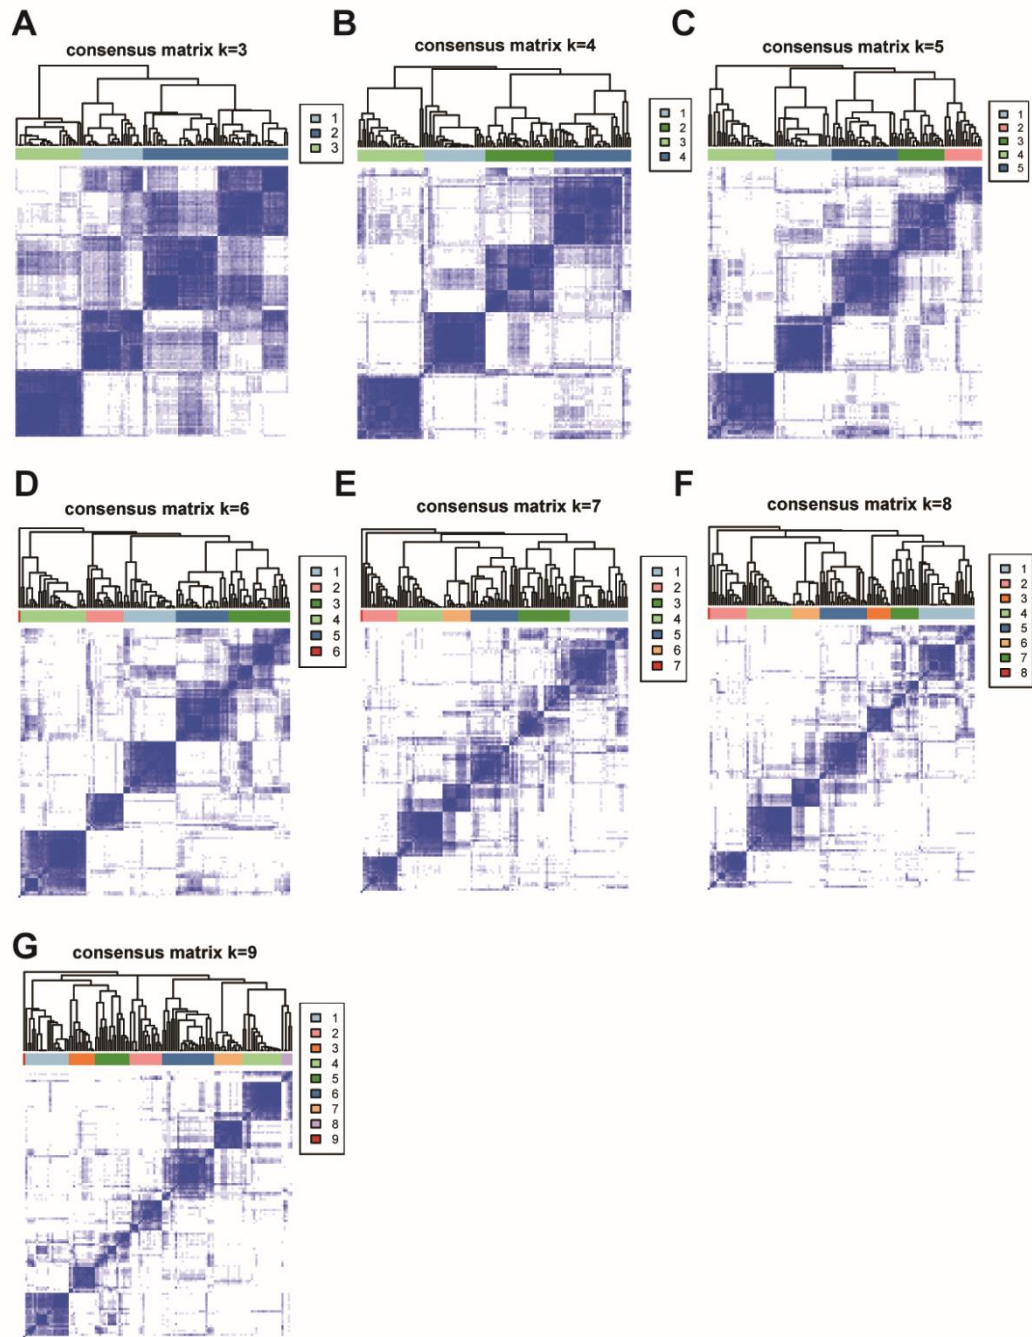

Fig. S2 Unsupervised consensus clustering analysis for HF samples based on  $m^7G$  regulators expression profiles. A-G, Heatmaps of the matrix of co-occurrence proportions for  $k = 3-9$ .

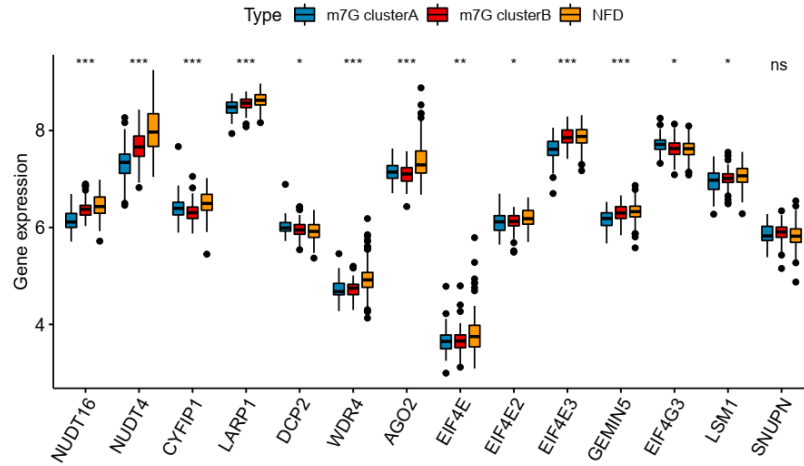

Fig. S3. The expression profiles of the 14 m<sup>7</sup>G regulators in HF subtype A, subtype B, and NFDs were compared using one way ANOVA. ns = not significant, \* $p < 0.05$ , \*\* $p < 0.01$ , and \*\*\* $p < 0.001$  among the three groups.

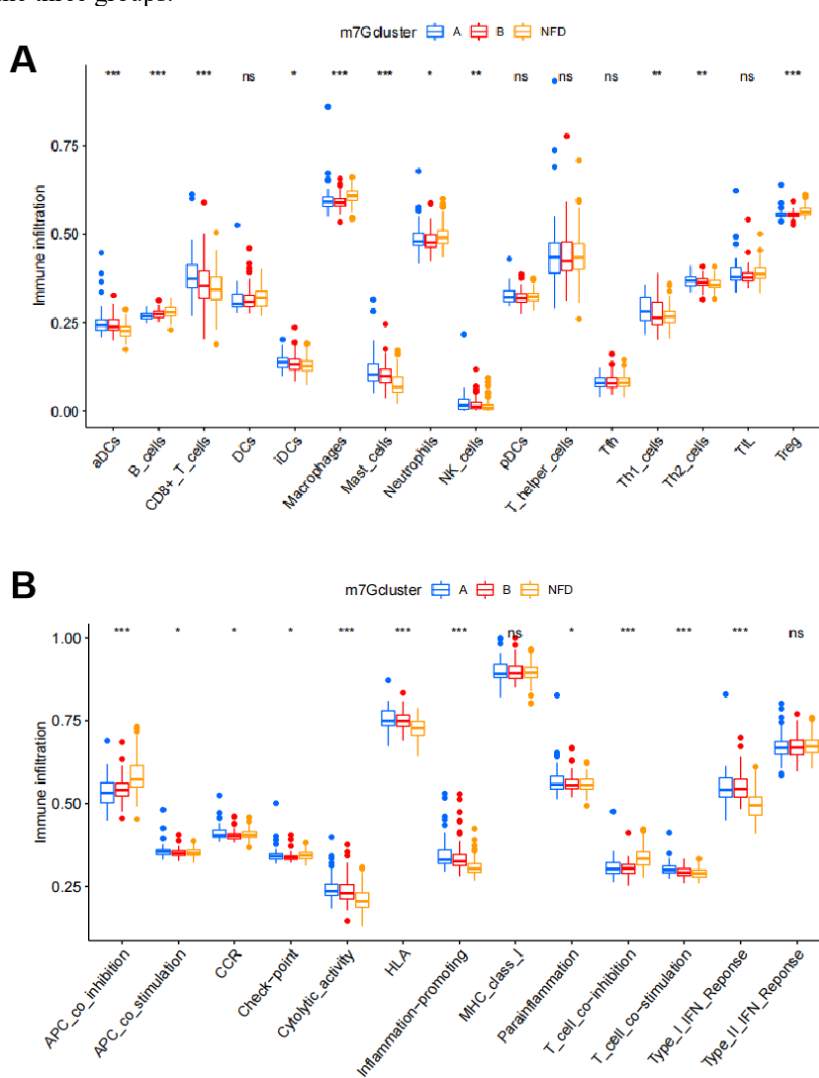

Fig. S4. The distribution of infiltrating immune cells or activity of immune-related functions in each HF subtype was compared with that of NFDs. A, The infiltration scores of 16 immune cells among two m<sup>7</sup>G subtypes and NFDs. One way ANOVA was used. ns = not significant, \* $p < 0.05$ , \*\* $p < 0.01$ , and \*\*\* $p < 0.001$  among the three groups. B, The infiltration scores of 13 immune-related functions among two m<sup>7</sup>G subtypes and NFDs. ns = not significant, \* $p < 0.05$ , \*\*\* $p < 0.001$  among the three groups.

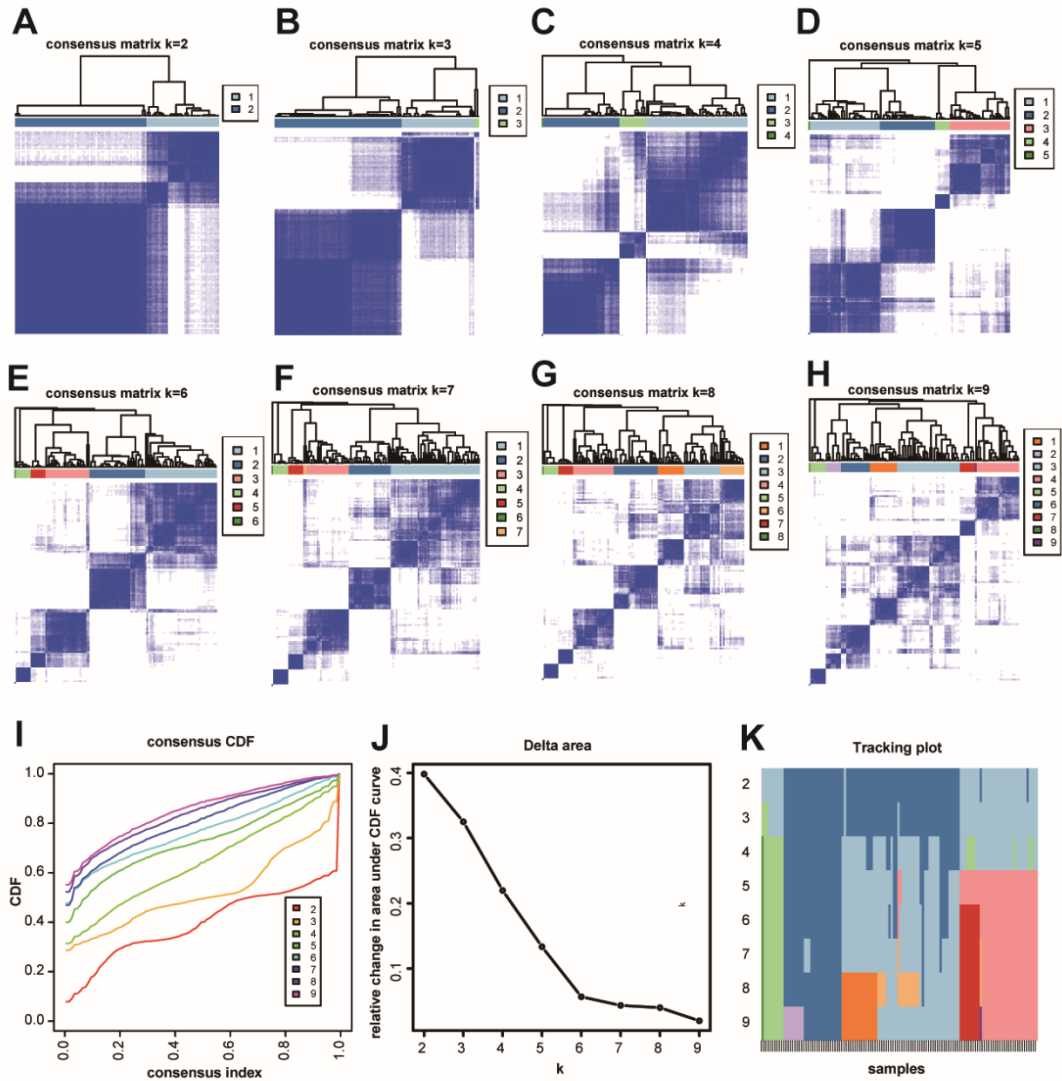

Fig. S5 Clustering analysis for HF samples based on the  $m^7G$  subtype-related differentially expressed genes. A-H, Heatmap of the matrix of co-occurrence proportions for HF samples for  $k = 2-9$ . I, Consensus clustering cumulative distribution function (CDF) for  $k = 2-9$ . J, Relative change in area under CDF curve for  $k = 2-9$ . K, Tracking plot for  $k = 2-9$ .

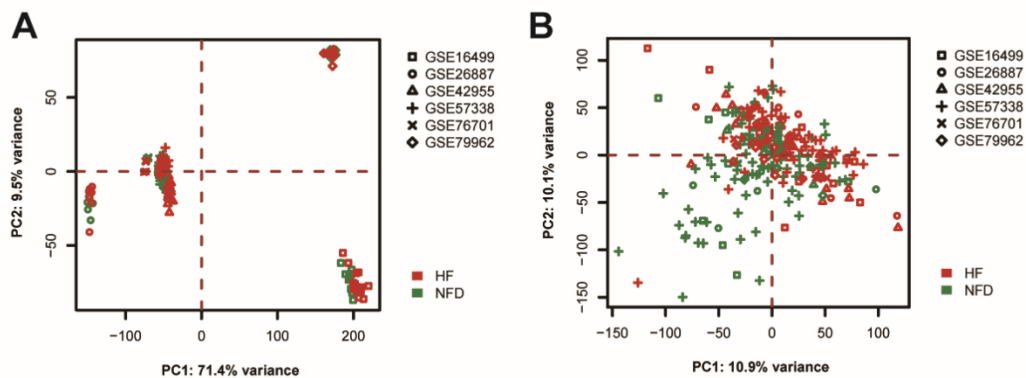

Fig. S6 Principal component analysis of batch-corrected expression data of HF microarray datasets. The gene expression profiling was annotated using the annotation document of corresponding platforms, and the batch effects were eliminated by implementation of the “Combat” algorithm in the sva R package. A, Before batch correction; B, After batch correction.

## References

1. Kong SW, Hu YW, Ho JW, Ikeda S, Polster S, John R, et al. Heart failure-associated changes in RNA splicing of sarcomere genes. *Circulation Cardiovascular genetics*. 2010;3(2):138-46.
2. Greco S, Fasanaro P, Castelvechio S, D'Alessandra Y, Arcelli D, Di Donato M, et al. MicroRNA dysregulation in diabetic ischemic heart failure patients. *Diabetes*. 2012;61(6):1633-41.
3. Molina-Navarro MM, Roselló-Lleti E, Ortega A, Tarazón E, Otero M, Martínez-Dolz L, et al. Differential gene expression of cardiac ion channels in human dilated cardiomyopathy. *PloS one*. 2013;8(12):e79792.
4. Liu Y, Morley M, Brandimarto J, Hannenhalli S, Hu Y, Ashley EA, et al. RNA-Seq identifies novel myocardial gene expression signatures of heart failure. *Genomics*. 2015;105(2):83-9.
5. Kim EH, Galchev VI, Kim JY, Misek SA, Stevenson TK, Campbell MD, et al. Differential protein expression and basal lamina remodeling in human heart failure. *Proteomics Clinical applications*. 2016;10(5):585-96.
6. Matkovich SJ, Al Khiami B, Efimov IR, Evans S, Vader J, Jain A, et al. Widespread Down-Regulation of Cardiac Mitochondrial and Sarcomeric Genes in Patients With Sepsis. *Critical care medicine*. 2017;45(3):407-14.
7. Yang KC, Yamada KA, Patel AY, Topkara VK, George I, Cheema FH, et al. Deep RNA sequencing reveals dynamic regulation of myocardial noncoding RNAs in failing human heart and remodeling with mechanical circulatory support. *Circulation*. 2014;129(9):1009-21.
8. Sweet ME, Cocciolo A, Slavov D, Jones KL, Sweet JR, Graw SL, et al. Transcriptome analysis of human heart failure reveals dysregulated cell adhesion in dilated cardiomyopathy and activated immune pathways in ischemic heart failure. *BMC Genomics*. 2018;19(1):812.
